# Supplementary material for: High-throughput screening of transition metal doping and defect engineering on single layer SnS2 for the water splitting hydrogen evolution reaction
Source: Royal Society of Chemistry journal article supplement (doi:10.1039/d2ta04254a), 2022-01-01
Supplement: d2ta04254a1.pdf [file d2ta04254a1.pdf]

## Electronic Supplementary Material (ESI)

# High-throughput screening of transition metal doping and defect engineering on single layer SnS<sub>2</sub> for water splitting hydrogen evolution reaction

Ruixin Xu,<sup>a</sup> Tingting Bo,<sup>a</sup> Shiqian Cao,<sup>a</sup> Nan Mu,<sup>a</sup> Yanyu Liu,<sup>\*b</sup> Mingyan Chen<sup>c</sup> and Wei Zhou<sup>\*a</sup>

<sup>1</sup>Department of Applied Physics, Tianjin Key Laboratory of Low Dimensional Materials Physics and Preparing Technology, School of Science, Tianjin University, Tianjin 300072, P. R. China.

<sup>2</sup>College of Physics and Materials Science, Tianjin Normal University, Tianjin, 300387, P. R. China.

<sup>3</sup>Hongzhiwei Technology (Shanghai) Co., Ltd., 1599 Xinqin Road, Pudong, Shanghai, China.

<sup>\*</sup>Corresponding author.

*E-mail address:* weizhou@tju.edu.cn (Wei Zhou), yylu@tjnu.edu.cn (Yanyu Liu)

## Section 1

**Table S1** The number of valence electron ( $\theta$ ) and the electronegativity ( $X_M$ ) of doped

TM atom.

| TM atom | $\theta$ | $X_M$ | TM atom | $\theta$ | $X_M$ |
|---------|----------|-------|---------|----------|-------|
| Sc      | 3        | 1.36  | Y       | 3        | 1.22  |
| Ti      | 4        | 1.54  | Zr      | 4        | 1.33  |
| V       | 5        | 1.63  | Nb      | 5        | 1.60  |
| Cr      | 6        | 1.66  | Mo      | 6        | 2.16  |
| Mn      | 7        | 1.55  | Tc      | 7        | 1.90  |
| Fe      | 8        | 1.83  | Ru      | 8        | 2.20  |
| Co      | 9        | 1.88  | Rh      | 9        | 2.28  |
| Ni      | 10       | 1.91  | Pd      | 10       | 2.20  |
| Cu      | 11       | 1.90  | Ag      | 11       | 1.93  |
| Zn      | 12       | 1.65  | Cd      | 12       | 1.69  |
| Sn      | 4        | 1.96  |         |          |       |

## Section 2

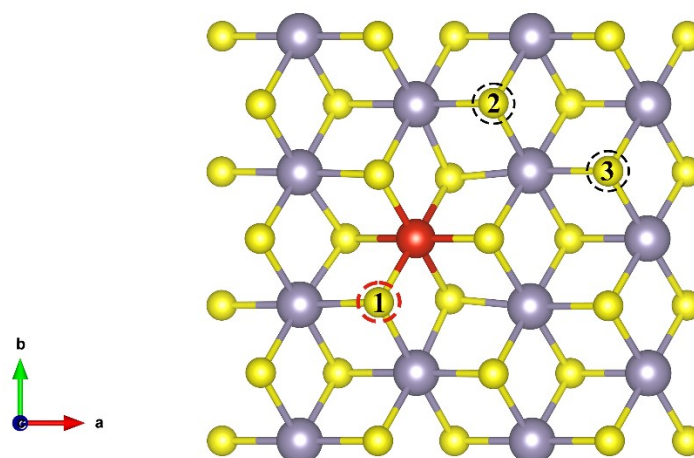

**Fig. S1** The top view of three different S sites of TM@SnS<sub>2</sub> nanosheets. The yellow, gray and red balls denote S, Sn and TM atoms, respectively. The red (S1) and black (S2, S3) dotted balls show the S site we chose and other different S sites of H atom adsorption.

### Section 3

**Table S2** Calculated adsorption energies ( $E_{\text{ads}}$ ) of H atom adsorbed on different S sites of TM@SnS<sub>2</sub> nanosheets.

| TM | $E_{\text{ads}}$ (eV) |       |       | TM | $E_{\text{ads}}$ (eV) |       |       |
|----|-----------------------|-------|-------|----|-----------------------|-------|-------|
|    | S1                    | S2    | S3    |    | S1                    | S2    | S3    |
| Sc | -3.25                 | -3.15 | -3.22 | Y  | -3.26                 | -3.22 | -3.23 |
| Ti | -2.19                 | -2.05 | -2.09 | Zr | -1.95                 | -1.91 | -1.95 |
| V  | -2.47                 | -2.32 | -2.38 | Nb | -2.19                 | -2.15 | -2.13 |
| Cr | -2.87                 | -2.71 | -2.77 | Mo | -2.30                 | -2.26 | -2.21 |
| Mn | -2.50                 | -2.43 | -2.41 | Tc | -2.61                 | -2.57 | -2.51 |
| Fe | -2.80                 | -2.71 | -2.64 | Ru | -2.88                 | -2.85 | -2.74 |
| Co | -3.12                 | -2.88 | -2.94 | Rh | -3.13                 | -3.13 | -3.00 |
| Ni | -2.50                 | -2.05 | -2.03 | Pd | -2.04                 | -1.66 | -1.62 |
| Cu | -3.31                 | -2.73 | -2.70 | Ag | -3.20                 | -2.62 | -2.62 |
| Zn | -3.51                 | -2.96 | -2.99 | Cd | -3.30                 | -2.96 | -2.96 |

## Section 4

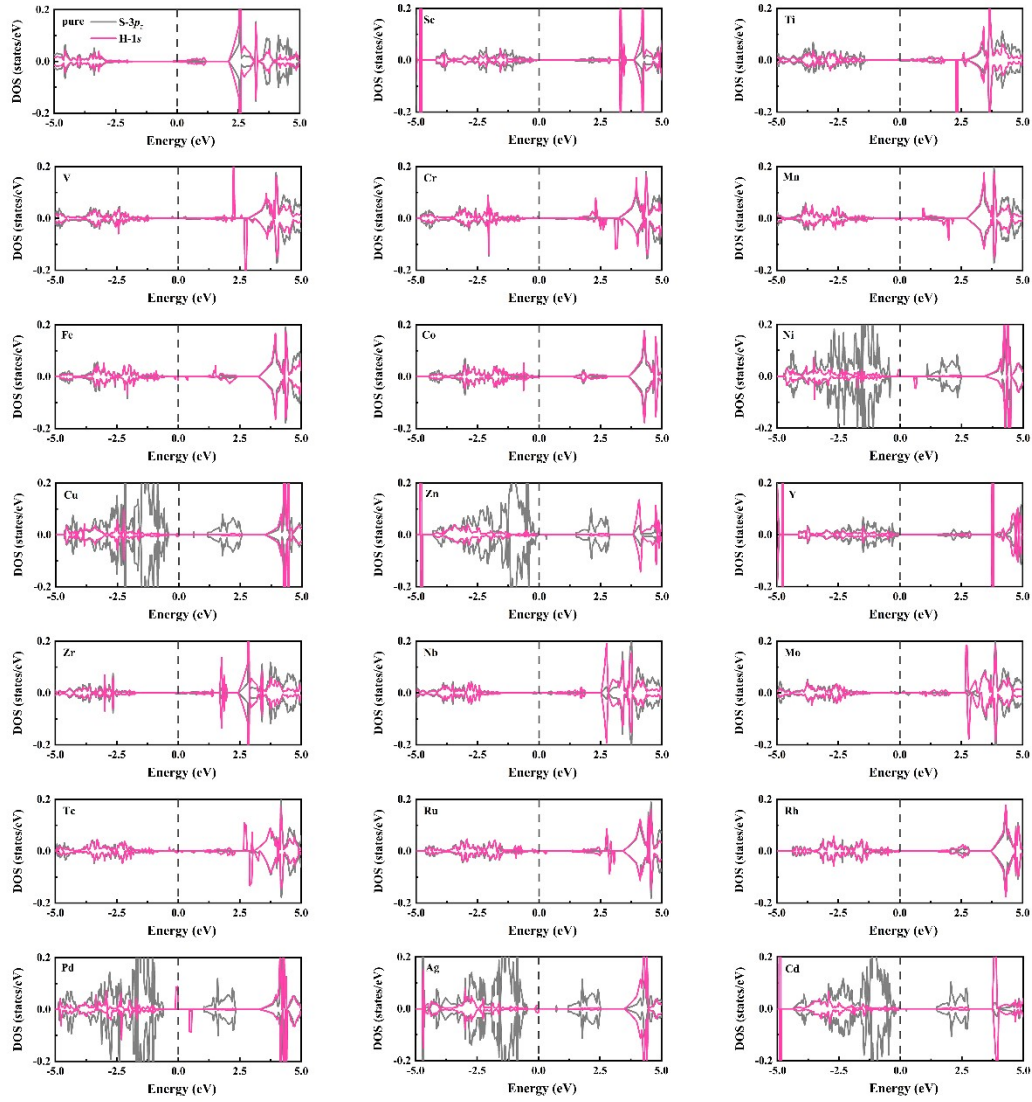

**Fig. S2** PDOS of the H-1s and S-3 $p_z$  states in pristine and TM@SnS<sub>2</sub> after H atom adsorption (TM= Sc, Ti, V, Cr, Mn, Fe, Co, Ni, Cu, Zn, Y, Zr, Nb, Mo, Tc, Ru, Rh, Pd, Ag, Cd). The Fermi level is aligned to 0 eV. The gray and pink represent the contributions of S-3 $p_z$  and H-1s states, respectively.

## Section 5

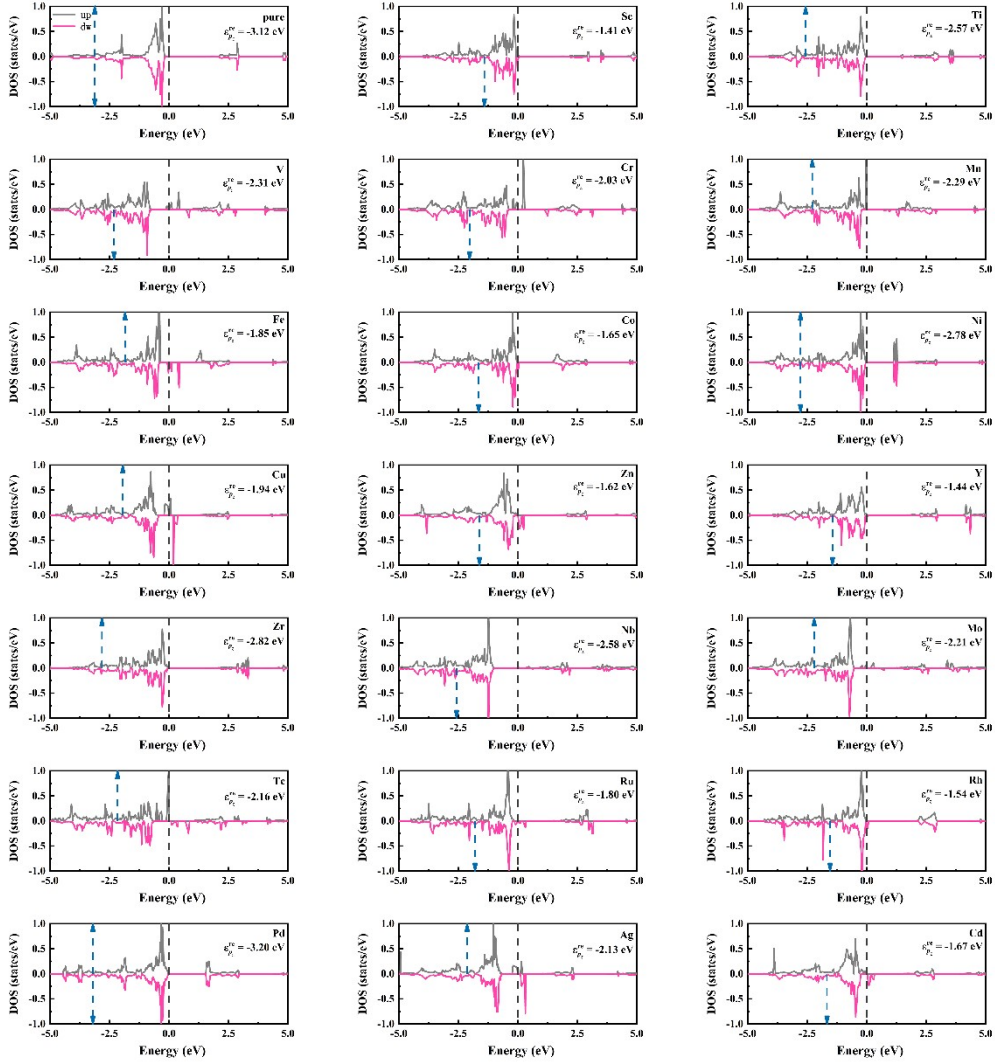

**Fig. S3** PDOS of S- $3p_z$  state at active sites in pristine and TM@SnS<sub>2</sub> nanosheets before H atom adsorption. The Fermi level is aligned to 0 eV. The gray and pink represent the contributions of spin up and spin down of S- $3p_z$  states, respectively. The blue arrow shows the position of  $\varepsilon(p_z)^{re}$ .

## Section 6

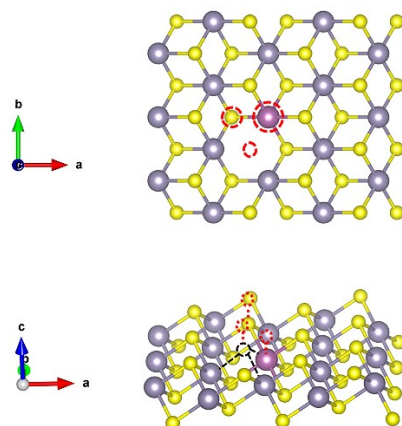

**Fig. S4** The top and side views of three adsorption configurations: TM-top site, S-top site and hollow site. The yellow, gray and purple balls denote S, Sn and TM atoms, respectively. The black and pink dotted ball shows S vacancy site and adsorption sites of H atom.

## Section 7

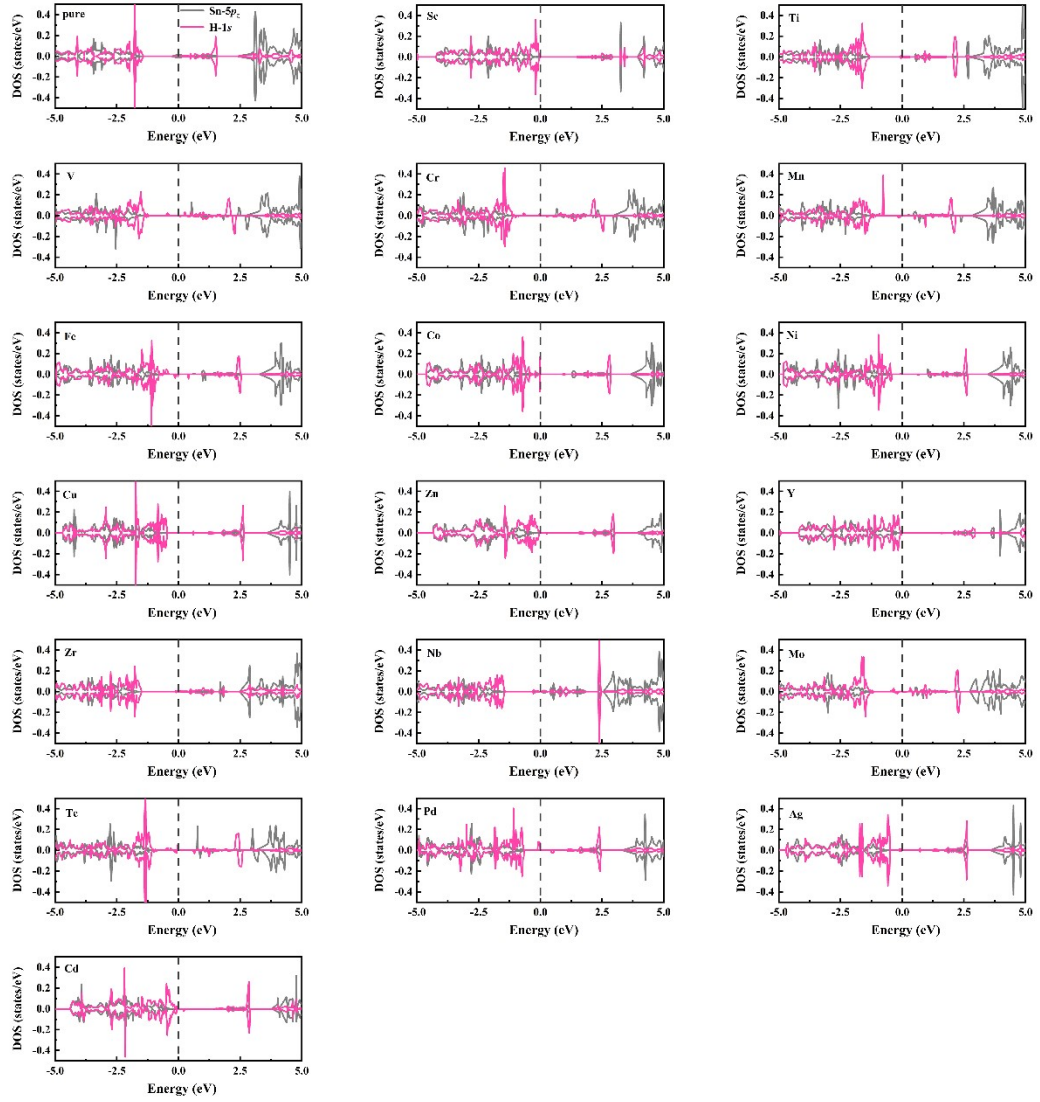

**Fig. S5** PDOS of the H-1s and Sn-5p<sub>z</sub> states in pristine and TM@V<sub>s, hollow</sub>-SnS<sub>2</sub> after H atom adsorption. The gray and pink represent the contributions of Sn-5p<sub>z</sub> and H-1s states, respectively.

## Section 8

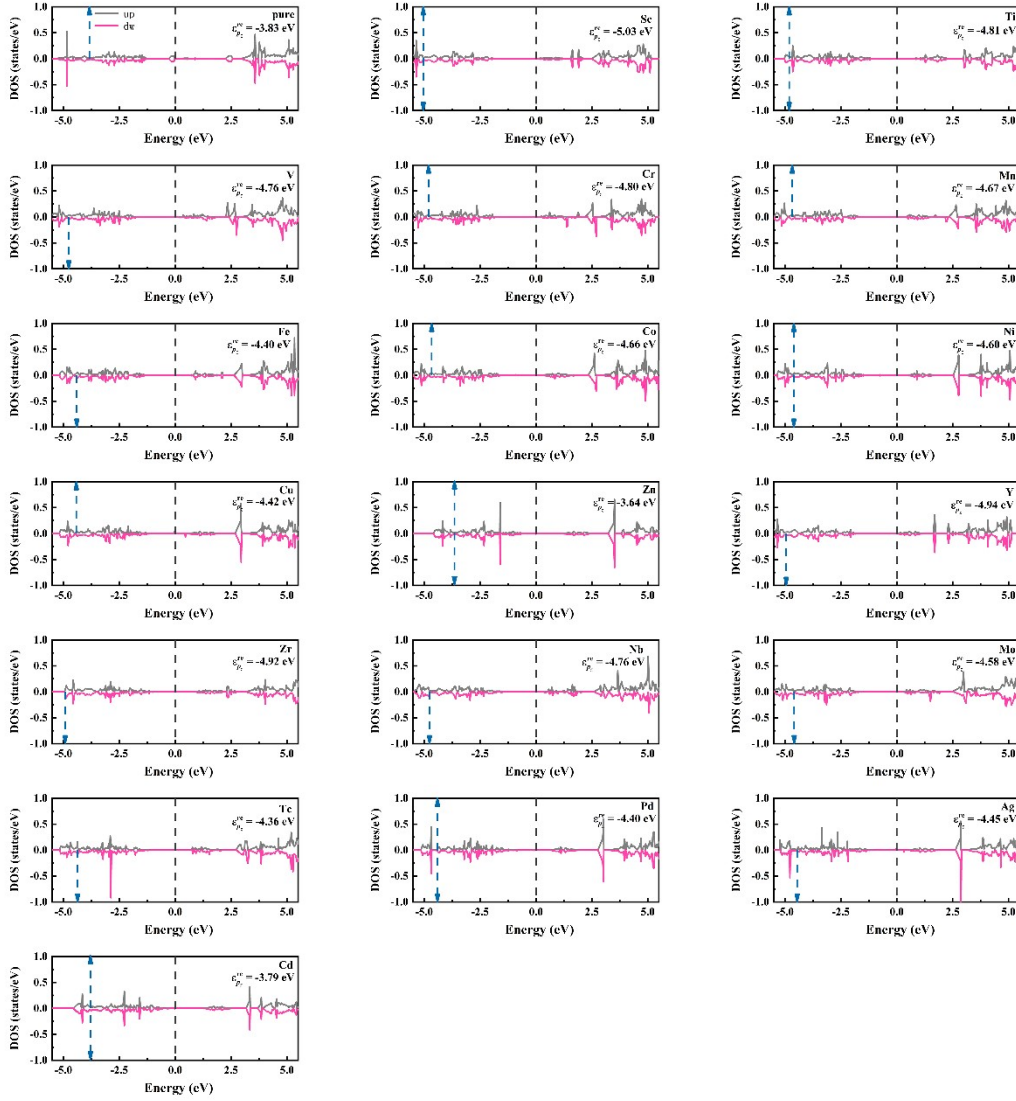

**Fig. S6** PDOS of Sn-5 $p_z$  state at active sites in pristine and TM@V<sub>s, hollow</sub>-SnS<sub>2</sub> before H atom adsorption. The gray and pink represent the contributions of spin up and spin down of Sn-5 $p_z$  states, respectively. The blue arrow shows the position of  $\epsilon(p_z)^{re}$ .

## Section 9

**Table S3** Relative changes in TM-S ( $\Delta d_{TM-S}/d_{TM-S}$ ) and nearest-neighbors Sn-S ( $\Delta d_{Sn-S}/d_{Sn-S}$ ) bond lengths upon H adsorption at the top of S atom in the basal plane; the distance between the S atom (adsorption site) and the adsorbed H atom ( $d_{S-H}$ ) in the TM@SnS<sub>2</sub> nanosheets.

| TM dopant | $\Delta d_{TM-S}/d_{TM-S}$ (%) | $\Delta d_{Sn1-S}/d_{Sn1-S}$ (%) | $\Delta d_{Sn2-S}/d_{Sn2-S}$ (%) | $d_{H-S}$ (Å) |
|-----------|--------------------------------|----------------------------------|----------------------------------|---------------|
| pure      | +5.06                          | +5.31                            | +5.06                            | 1.354         |
| Sc        | +3.97                          | +5.37                            | +5.10                            | 1.352         |
| V         | +11.73                         | +1.60                            | +1.53                            | 1.355         |
| Mn        | +6.01                          | +2.99                            | +3.19                            | 1.356         |
| Co        | -2.51                          | +4.95                            | +5.47                            | 1.358         |
| Ni        | +34.80                         | +2.87                            | +2.61                            | 1.358         |
| Tc        | +6.53                          | +2.42                            | +2.44                            | 1.356         |

## Section 10

**Table S4** The difference of Bader charge of TM atom and its neighbor S atoms, adsorbed H atom in TM@SnS<sub>2</sub> before and after H atom adsorption.

| TM dopant | S1   | S2    | S3    | S4   | S5    | active site | TM    | H     |
|-----------|------|-------|-------|------|-------|-------------|-------|-------|
|           |      |       |       |      |       | S6          |       |       |
| pure      | 0.01 | -0.01 | -0.01 | 0.01 | 0     | -0.27       | 0.02  | -0.08 |
| Sc        | 0.03 | 0.02  | 0.02  | 0.04 | 0     | -0.28       | -0.01 | -0.08 |
| V         | 0.02 | 0.03  | 0.03  | 0.03 | 0.03  | -0.26       | 0.05  | -0.08 |
| Mn        | 0.02 | 0     | 0.01  | 0.02 | 0     | -0.22       | 0.05  | -0.10 |
| Co        | 0.02 | 0.01  | 0.01  | 0.02 | 0     | -0.20       | 0.04  | -0.10 |
| Ni        | 0.03 | 0.03  | 0.04  | 0.03 | 0.02  | -0.16       | 0.01  | -0.08 |
| Tc        | 0.04 | -0.03 | -0.02 | 0.05 | -0.02 | -0.24       | 0.07  | -0.06 |

## Section 11

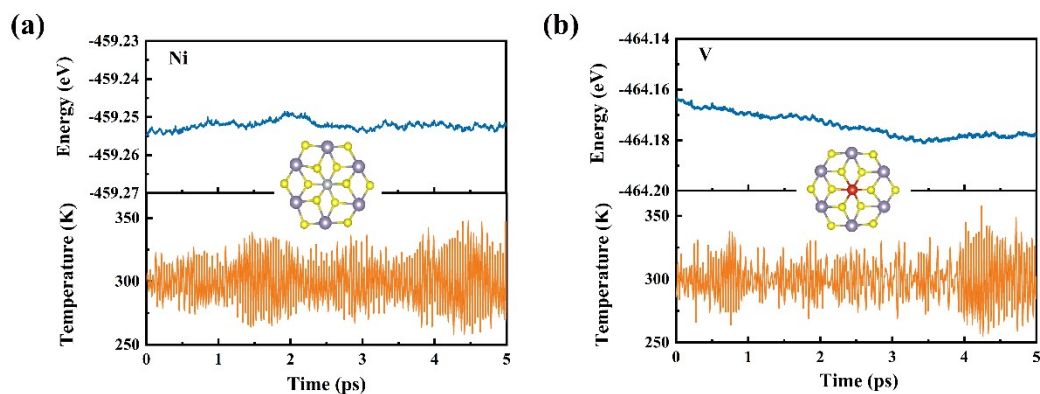

**Fig. S7** Variations of energy and temperature of Ni and V@SnS<sub>2</sub> nanosheets against the AIMD simulation time. The insets denote the top view of V, Ni@SnS<sub>2</sub> nanosheets after AIMD simulation lasting for 5 ps at  $T=300$  K. It was found that their crystal structures do not present obvious distortion, implying the dynamic stability of these doped nanosheets.

## Section 12

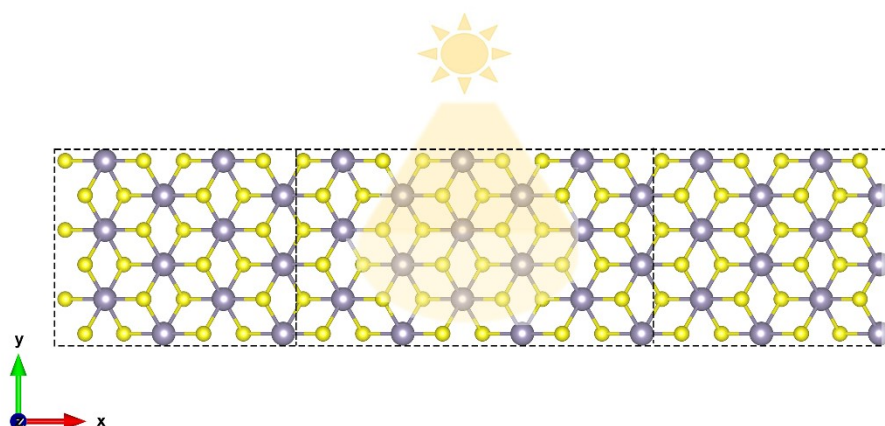

**Fig. S8** The schematic diagram of the device model.

## Section 13

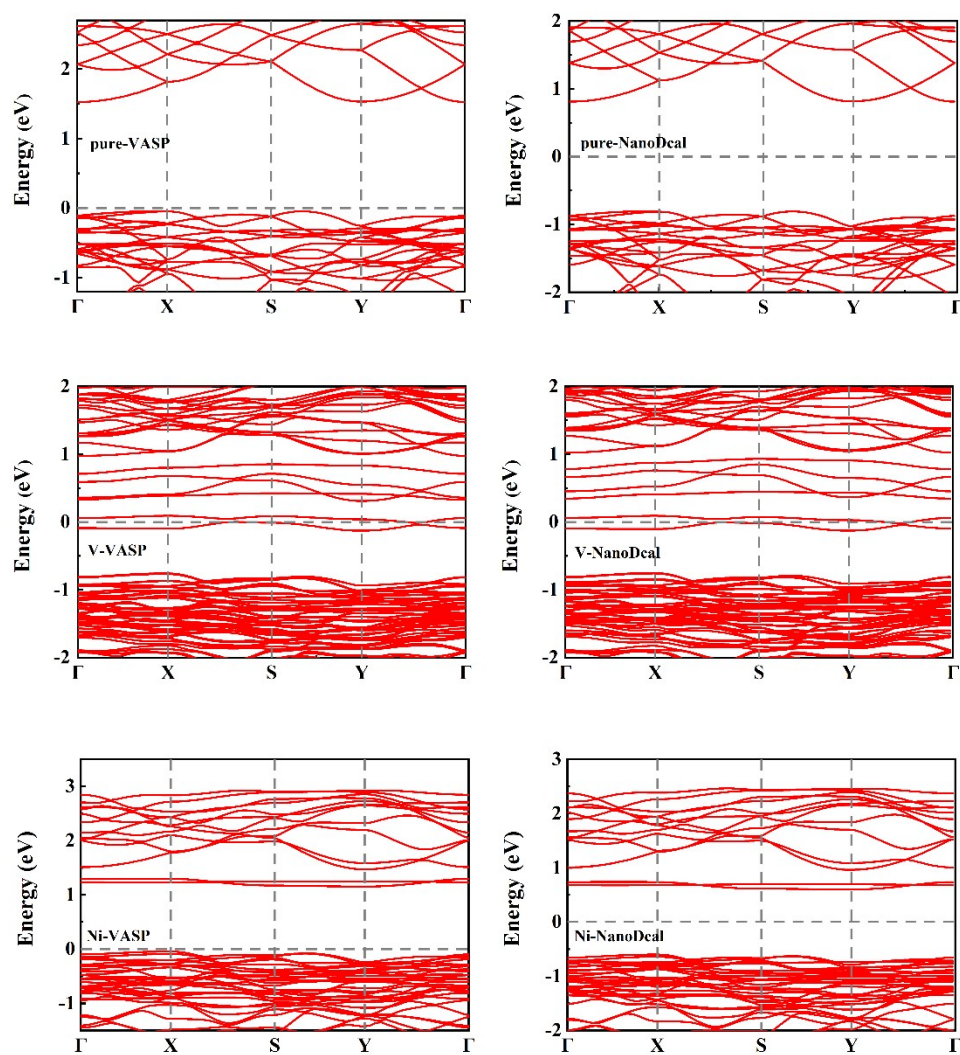

**Fig. S9** Calculated band structure of pure, V, Ni@SnS<sub>2</sub> nanosheets by VASP and NanoDcal.

## Section 14

### The calculation formula of photocurrent<sup>1, 2</sup>.

For linearly polarized light, the photocurrent injected into the left electrode can be written as,

$$J_L^{(ph)} = \frac{ie}{h} \int \{ \cos^2 \theta \text{Tr} \{ \Gamma_L [ G_1^{<(ph)} + f_L (G_1^{>(ph)} - G_1^{<(ph)}) ] \} + \sin^2 \theta \text{Tr} \{ \Gamma_L [ G_2^{<(ph)} + f_L (G_2^{>(ph)} - G_2^{<(ph)}) ] + \sin^2 (2\theta) 2 \text{Tr} \{ \Gamma_L [ G_3^{<(ph)} + f_L (G_3^{>(ph)} - G_3^{<(ph)}) ] \} \} dE \} \quad (1)$$

where

$$G_1^{>(<)}^{ph} = \sum_{\alpha, \beta = x, y, z} C_0 N G_0^r e_{1\alpha} p_\alpha^\dagger G_0^{>(<)} e_{1\beta} p_\beta G_0^a \quad (2)$$

$$G_2^{>(<)}^{ph} = \sum_{\alpha, \beta = x, y, z} C_0 N G_0^r e_{2\alpha} p_\alpha^\dagger G_0^{>(<)} e_{2\beta} p_\beta G_0^a \quad (3)$$

$$G_3^{>(<)}^{ph} = \sum_{\alpha, \beta = x, y} \sum_{z, j = 1, 2} C_0 N (e_{j\alpha} p_\alpha^\dagger G_0^{>(<)} e_{j\beta} p_\beta G_0^a) \quad (4)$$

where,  $G_{1,2,3}^{>(<)}^{ph}$  are greater than green number and less than green function with the interaction between photon and electron,  $G_0^{>(<)}$  is greater than and less than Green's function without photon-electron interaction.  $\Gamma_L$  denotes the line width function of the left electrode.  $f_L$  is the Fermi-Dirac distribution function of the left electrode.  $m$  stands for net electron mass.  $I_\omega$  is the photon flux, defined as the number of photons per unit area per unit time.  $\omega$  is the photon frequency.  $N$  represents the number of photons.  $\mu_r$ ,  $C$  and  $\varepsilon_r$  are relative magnetic susceptibility, the speed of light and relative permittivity respectively.  $\varepsilon$  is the dielectric constant.  $G_0^a$  and  $G_0^r$  are advanced green's functions and delayed Green's functions respectively.  $p_\alpha^\dagger$  and  $p_\beta$  represent the components of the

electron momentum in cartesian coordinates.  $e_{1\alpha}, e_{2\alpha}, e_{1\beta}, e_{2\beta}$  sent the unit vector in the Cartesian coordinate system. For linearly polarized light,  $\hat{e} = \cos\theta\hat{e}_1 + \sin\theta\hat{e}_2$ , where  $\theta$  is the angle of polarization with respect to vector  $\hat{e}_1$ , and  $\hat{e}_1, \hat{e}_2$  represent the unit vector. To make the calculation of photocurrent more convenient, the current is normalized, and the optical response function is written as:

$$R = \frac{J_L^{(ph)}}{eI_\omega} \quad (5)$$

## References

1. J. Chen, Y. Hu and H. Guo, *Phys. Rev. B*, 2012, **85**.
2. L. Zhang, K. Gong, J. Chen, L. Liu, Y. Zhu, D. Xiao and H. Guo, *Phys. Rev. B*, 2014, **90**.
